# Supplementary material for: New Insights into Gastrointestinal Involvement in Late-Onset Pompe Disease: Lessons Learned from Bench and Bedside
Source: MDPI journal article supplement (doi:10.3390/jcm10153395), 2021-07-30
Supplement: s1 [file s1]

**Supplementary Table S1.** GI-focused medical history to assess the GI health of adult patients with Pompe disease.

- 1) Have you been diagnosed with a gastrointestinal (GI) disease or disorder by a physician? If yes, please list. (Examples include but are not limited to: swallowing dysfunction, esophageal dysmotility, GERD/acid reflux, gastritis, peptic ulcer disease, delayed gastric emptying, gallstones or other gallbladder/biliary disease, irritable bowel syndrome/IBS, celiac disease, Crohn's disease, ulcerative colitis, rectal sphincter dysfunction, fecal incontinence, etc.)
- 2) Have you been evaluated by a gastroenterologist (GI physician)?
- 3) Have you undergone an upper endoscopy? If so, for what reason?
- 4) Have you undergone a colonoscopy? If so, for what reason?
- 5) Have you been diagnosed with TMJ (temporomandibular joint) dysfunction?
- 6) Have you been told that you have tongue weakness by a medical professional (physician, therapist, etc.)? A history of difficulty with chewing, especially meats, any jaw fatigue? Any history of things getting stuck in throat? Difficulty with clearing food with tongue?
- 7) How many stools do you typically have per day?
- 8) If you do not have stools daily, how many stools do you typically have per week?
- 9) Are your GI symptoms worse at any time period of the day? Please state which symptom(s) and its association(s). If the question does not apply to you, please answer N/A.
- 10) Are your GI symptoms temporally associated with meals? Please state which symptoms(s) and its association(s). If the question does not apply to you, please answer N/A.
- 11) Do you take medications to relieve GI symptoms? If so, which medications and how often?
- 12) Do you consider your GI symptoms to be one of your top three symptoms that affects your quality of life?
- 13) From your recollection, did your GI symptoms start bothering you before or after your diagnosis of Pompe disease? Please state how long before/after to the best of your knowledge.
- 14) Has there been a change in your GI symptoms since you started treatment with ERT? Please state what changed and how it changed.
- 15) Is there worsening of GI symptoms after ERT (same day or up to 48 hours after)? Describe.
- 16) Do you have any other comments or concerns regarding GI issues?

**Supplementary Table S2.** Relationship between raw scores on PROMIS-GI symptom scales and clinical variables in patients with late-onset Pompe disease.

| Statistical relationships which were close to being significant or significant |                                                 | p-value         |
|--------------------------------------------------------------------------------|-------------------------------------------------|-----------------|
| belly pain (raw score)                                                         | patient's age                                   | 0.0471*         |
| diarrhea (raw score)                                                           | sex (male)                                      | 0.0686          |
| swallowing (raw score)                                                         | CPK                                             | 0.0740          |
| incontinence (raw score)                                                       | CPK                                             | 0.0619          |
| swallowing (raw score)                                                         | FVC % predicted (supine) – inverse relationship | <b>0.0036**</b> |
| diarrhea (raw score)                                                           | FVC % predicted (supine) – inverse relationship | 0.0450*         |
| incontinence (raw score)                                                       | FVC % predicted (supine) – inverse relationship | 0.0264*         |

\*p-value < 0.05, \*\*p-value using Bonferroni correction <0.006.
